# Supplementary material
Source: publisher site journal article supplement (https://www.dovepress.com/article/381170)
Supplement: Supplementary file 1 [file get_supplementary_file.php]

Supporting information

M1 macrophage derived sono-responsive nanoparticles for sonodynamic anticancer therapy

Sijie Chen **1,2**, Jiahao Wang **3,4,5,6**, Haiqin Liao **1,2**, Kui Tang **1,2**, Yan Xu **1,2**, Long Wang **3,4,5,6**, Chengcheng Niu **1,2** *

**1** Department of Ultrasound Diagnosis, The Second Xiangya Hospital, Central South University, Changsha, 410011, China

**2** Research Center of Ultrasonography, The Second Xiangya Hospital, Central South University, Changsha, 410011, China

**3**Department of Orthopedics, Xiangya Hospital, Central South University, Changsha, 410008, China

4 Hunan Engineering Research Center of Biomedical Metal and Ceramic Implants, Xiangya Hospital, Central South University, Changsha, China

5 National Clinical Research Center for Geriatric Disorders, Xiangya Hospital, Central South University, Changsha, China

6 Hunan key laboratary of aging biology, Xiangya Hospital, Central South University, Changsha, China

***Address all correspondence to:** Chengcheng Niu, Department of Ultrasound Diagnosis and Research Center of Ultrasonography, The Second Xiangya Hospital, Central South University, Changsha, China, 410011; E-mail: [niuchengcheng@csu.edu.cn](mailto:niuchengcheng@csu.edu.cn)





**Figure S1.** UV-vis-NIR absorption spectra of free IR780 and M1/IR780@PLGA nanoparticles.





**Figure S2.** The standard curve of IR780.





**Figure S3**.Size distributions of M1/IR780@PLGA nanoparticles in 1×PBS or 10% FBS for 7 days.





**Figure S4.** Zeta potential distributions of M1/IR780@PLGA nanoparticles in 1×PBS or 10% FBS for 7 days.


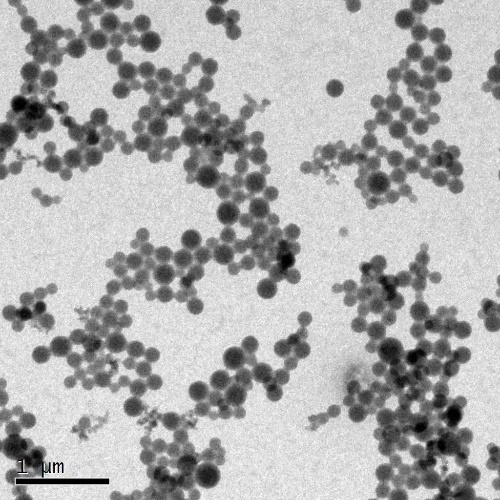


**Figure S5**. TEM image of nanocarbon labeled nanoparticles.


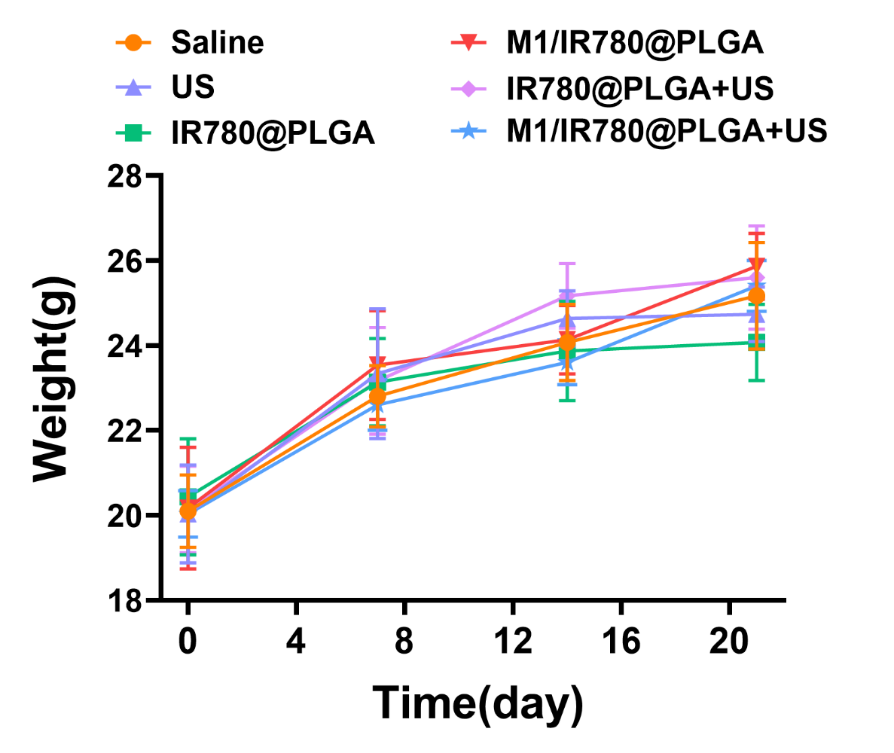


**Figure S6.** Changes of mice body weight during different treatments.

| **Table S1.** Primers used for quantitative real-time polymerase chain reaction. |
| --- |
| | **CD86-F** | TCTCCACGGAAACAGCATCT | | --- | --- | | **CD86-R** | CTTACGGAAGCACCCACGAT | | **iNOS-F** | CAGCTGGGCTGTACAAACCTT | | **iNOS-R** | CATTGGAAGTGAAGCGTTTCG | | **TNF–α-F** | AGCCGATGGGTTGTACCTTG | | **TNF–α-R** | ATAGCAAATCGGCTGACGGT | |
|  |
